# Supplementary material
Source: Springer Nature journal article supplement (https://www.springermedizin.de/resource/supplementary/12885_2011_2909_MOESM2_ESM.pdf/9462266)

**A**

Relative expression

Log<sub>2</sub>(Mammosphere cells/Adherent cells)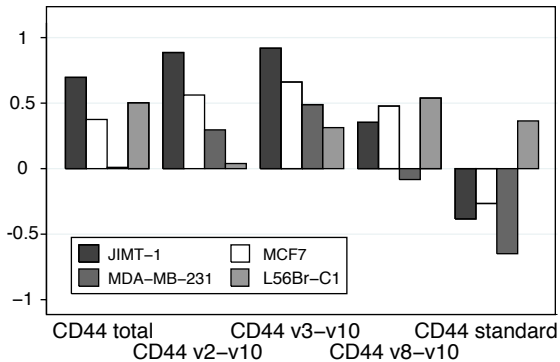**B**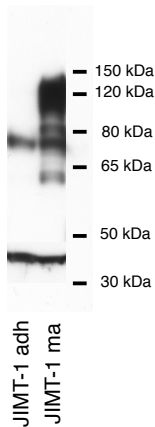

Supplement: MOESM2 [file 9462266]
